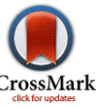

## Correction

# Correction: Prevalence of Diabetes in the Republic of Ireland: Results from the National Health Survey (SLAN) 2007

## The PLOS ONE Staff

There is an error in the second sentence of the "Results" sub-heading under the "Abstract" section. The correct sentence for this section is:

"Amongst adults aged 45+ years, the prevalence of doctor-diagnosed diabetes was 6.1% (95% CI 5.3% - 6.9%) and undiagnosed diabetes was 2.8% (95% CI 1.4% - 4.1%)."

## Reference

1. Balanda KP, Buckley CM, Barron SJ, Fahy LE, Madden JM, et al. (2013) Prevalence of Diabetes in the Republic of Ireland: Results from the National Health Survey (SLAN) 2007. PLoS ONE 8(10): e78406. doi:10.1371/journal.pone.0078406

---

**Citation:** The PLOS ONE Staff (2014) Correction: Prevalence of Diabetes in the Republic of Ireland: Results from the National Health Survey (SLAN) 2007. PLoS ONE 9(6): e99471. doi:10.1371/journal.pone.0099471

**Published:** June 3, 2014

**Copyright:** © 2014 The PLOS ONE Staff. This is an open-access article distributed under the terms of the Creative Commons Attribution License, which permits unrestricted use, distribution, and reproduction in any medium, provided the original author and source are credited.
